# Supplementary material for: The Microbial Diversity in Relation to Postharvest Quality and Decay: Organic vs. Conventional Pear Fruit
Source: MDPI journal article supplement (doi:10.3390/foods12101980), 2023-05-12
Supplement: s1 [file s1]

**Table S1** PERMANOVA (adonis) test for the differences of microorganisms between organic and conventional orchards in ‘Huangguan’ pears.

| <b>pairs</b>            | <b>R2</b> | <b>p.adjusted</b> | <b>significance</b> |
|-------------------------|-----------|-------------------|---------------------|
| <b>epiphytic fungi</b>  |           |                   |                     |
| Or0_ep vs Or15_ep       | 0.3581    | 0.0096            | *                   |
| Or0_ep vs Or30_ep       | 0.3959    | 0.0096            | *                   |
| Or0_ep vs Co0_ep        | 0.1147    | 0.4522            |                     |
| Or0_ep vs Co15_ep       | 0.2712    | 0.0096            | *                   |
| Or0_ep vs Co30_ep       | 0.5913    | 0.0096            | *                   |
| Or15_ep vs Or30_ep      | 0.6064    | 0.0096            | *                   |
| Or15_ep vs Co0_ep       | 0.4891    | 0.0096            | *                   |
| Or15_ep vs Co15_ep      | 0.6308    | 0.0096            | *                   |
| Or15_ep vs Co30_ep      | 0.8850    | 0.0096            | *                   |
| Or30_ep vs Co0_ep       | 0.4923    | 0.0096            | *                   |
| Or30_ep vs Co15_ep      | 0.4635    | 0.0096            | *                   |
| Or30_ep vs Co30_ep      | 0.5823    | 0.0096            | *                   |
| Co0_ep vs Co15_ep       | 0.3673    | 0.0096            | *                   |
| Co0_ep vs Co30_ep       | 0.7358    | 0.0096            | *                   |
| Co15_ep vs Co30_ep      | 0.5321    | 0.0096            | *                   |
| <b>endophytic fungi</b> |           |                   |                     |
| Or0_en vs Or15_en       | 0.0836    | 0.8457            |                     |
| Or0_en vs Or30_en       | 0.2597    | 0.0203            | *                   |
| Or0_en vs Co0_en        | 0.0885    | 0.6704            |                     |
| Or0_en vs Co15_en       | 0.1611    | 0.1109            |                     |
| Or0_en vs Co30_en       | 0.4412    | 0.0203            | *                   |
| Or15_en vs Or30_en      | 0.2216    | 0.0203            | *                   |
| Or15_en vs Co0_en       | 0.1340    | 0.3521            |                     |
| Or15_en vs Co15_en      | 0.1937    | 0.0453            | *                   |
| Or15_en vs Co30_en      | 0.4100    | 0.0203            | *                   |

---

|                            |        |        |   |
|----------------------------|--------|--------|---|
| Or30_en vs Co0_en          | 0.2626 | 0.0203 | * |
| Or30_en vs Co15_en         | 0.2250 | 0.0272 | * |
| Or30_en vs Co30_en         | 0.3855 | 0.0203 | * |
| Co0_en vs Co15_en          | 0.1703 | 0.1210 |   |
| Co0_en vs Co30_en          | 0.4154 | 0.0203 | * |
| Co15_en vs Co30_en         | 0.3251 | 0.0203 | * |
| <b>epiphytic bacteria</b>  |        |        |   |
| Or0_ep vs Or15_ep          | 0.7483 | 0.0133 | * |
| Or0_ep vs Or30_ep          | 0.5688 | 0.0127 | * |
| Or0_ep vs Co0_ep           | 0.1316 | 0.2185 |   |
| Or0_ep vs Co15_ep          | 0.2412 | 0.0133 | * |
| Or0_ep vs Co30_ep          | 0.6342 | 0.0127 | * |
| Or15_ep vs Or30_ep         | 0.7264 | 0.0127 | * |
| Or15_ep vs Co0_ep          | 0.5590 | 0.0127 | * |
| Or15_ep vs Co15_ep         | 0.7739 | 0.0127 | * |
| Or15_ep vs Co30_ep         | 0.7948 | 0.0127 | * |
| Or30_ep vs Co0_ep          | 0.4636 | 0.0127 | * |
| Or30_ep vs Co15_ep         | 0.5861 | 0.0127 | * |
| Or30_ep vs Co30_ep         | 0.4649 | 0.0127 | * |
| Co0_ep vs Co15_ep          | 0.1695 | 0.0171 | * |
| Co0_ep vs Co30_ep          | 0.4972 | 0.0127 | * |
| Co15_ep vs Co30_ep         | 0.6534 | 0.0127 | * |
| <b>endophytic bacteria</b> |        |        |   |
| Or0_en vs Or15_en          | 0.1566 | 0.1792 |   |
| Or0_en vs Or30_en          | 0.2038 | 0.0260 | * |
| Or0_en vs Co0_en           | 0.1934 | 0.0417 | * |
| Or0_en vs Co15_en          | 0.2451 | 0.0260 | * |
| Or0_en vs Co30_en          | 0.2668 | 0.0260 | * |
| Or15_en vs Or30_en         | 0.1384 | 0.1871 |   |
| Or15_en vs Co0_en          | 0.1045 | 0.4895 |   |

---

|                    |        |        |   |
|--------------------|--------|--------|---|
| Or15_en vs Co15_en | 0.1253 | 0.2827 |   |
| Or15_en vs Co30_en | 0.2112 | 0.0260 | * |
| Or30_en vs Co0_en  | 0.1473 | 0.1871 |   |
| Or30_en vs Co15_en | 0.1773 | 0.0600 |   |
| Or30_en vs Co30_en | 0.2299 | 0.0260 | * |
| Co0_en vs Co15_en  | 0.1453 | 0.1919 |   |
| Co0_en vs Co30_en  | 0.1556 | 0.1871 |   |
| Co15_en vs Co30_en | 0.1820 | 0.0536 |   |

---
